# Supplementary material
Source: ML conference proceedings conference paper supplement (https://proceedings.neurips.cc/paper_files/paper/2021/hash/b0b79da57b95837f14be95aaa4d54cf8-Abstract.html)
Supplement: Supplementary file 1 [file b0b79da57b95837f14be95aaa4d54cf8-Supplemental.zip]

Archive with 4 entries (4 files):
- supp.pdf
- __MACOSX/._supp.pdf
- full.pdf
- __MACOSX/._full.pdf
